# Supplementary material for: Vitamin A Plasma Levels in COVID-19 Patients: A Prospective Multicenter Study and Hypothesis
Source: MDPI journal article supplement (doi:10.3390/nu13072173), 2021-06-24
Supplement: s1 [file s1]

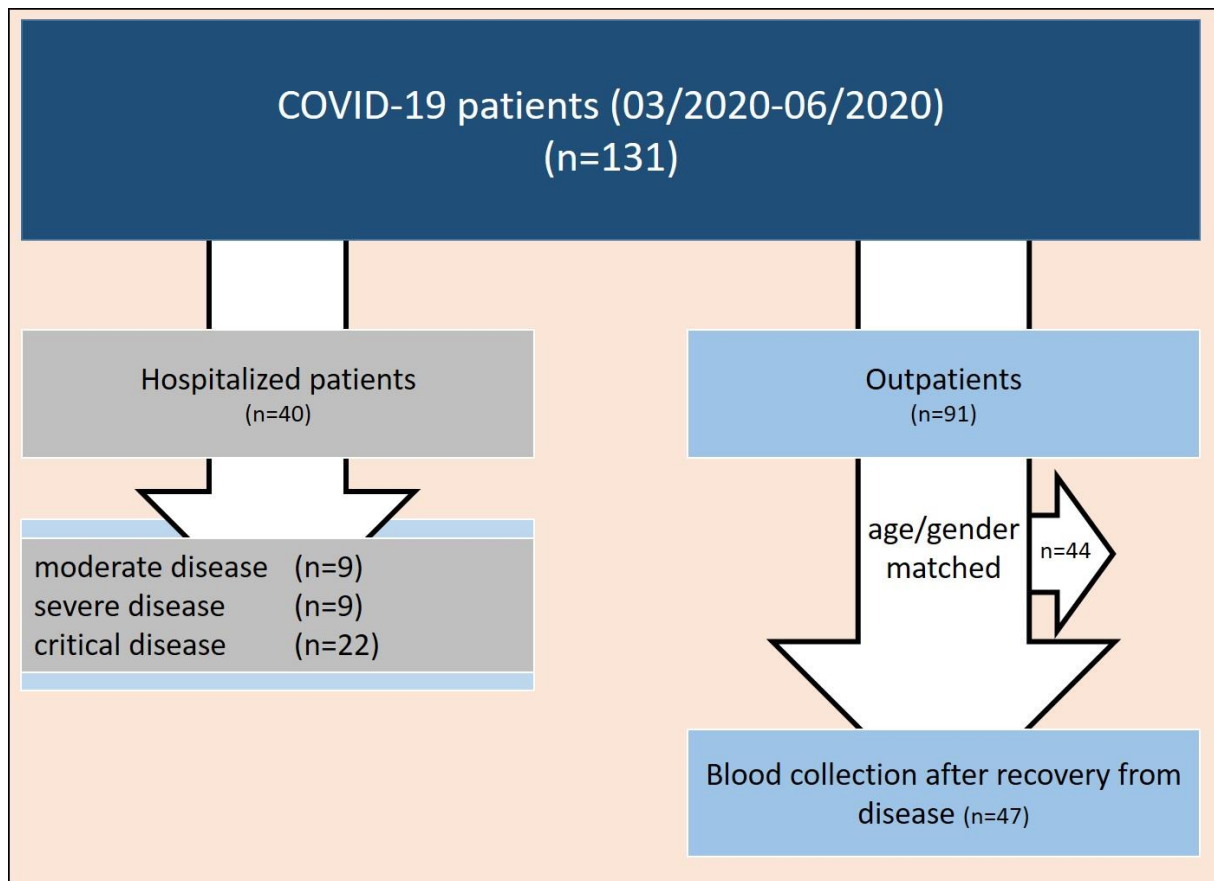

**Supplementary Figure S1.** Study flowchart Vitamin A plasma levels in COVID-19 patients: A prospective multicenter study and hypothesis. COVID-19, coronavirus disease 2019.

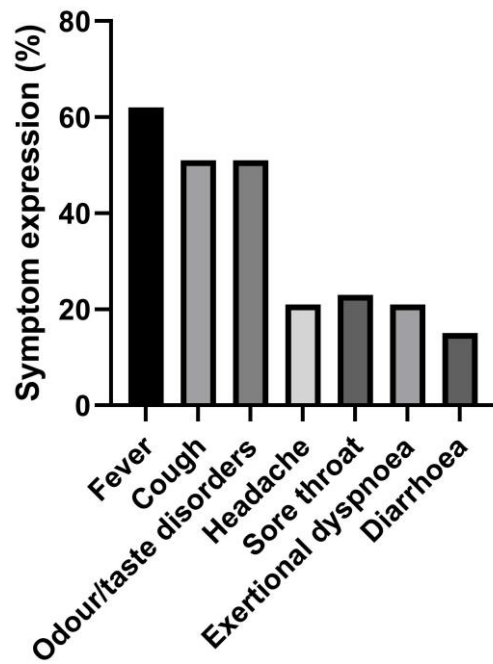

**Supplementary Figure S2.** Representation of the percentage symptom expression of the convalescent COVID-19 patient cohort during acute phase of disease. At the time of blood sampling after recovery from disease, the patients were all free of symptoms.

■ moderate disease   
 ■ severe disease   
 ■ critical disease   
 ■ convalescent patients

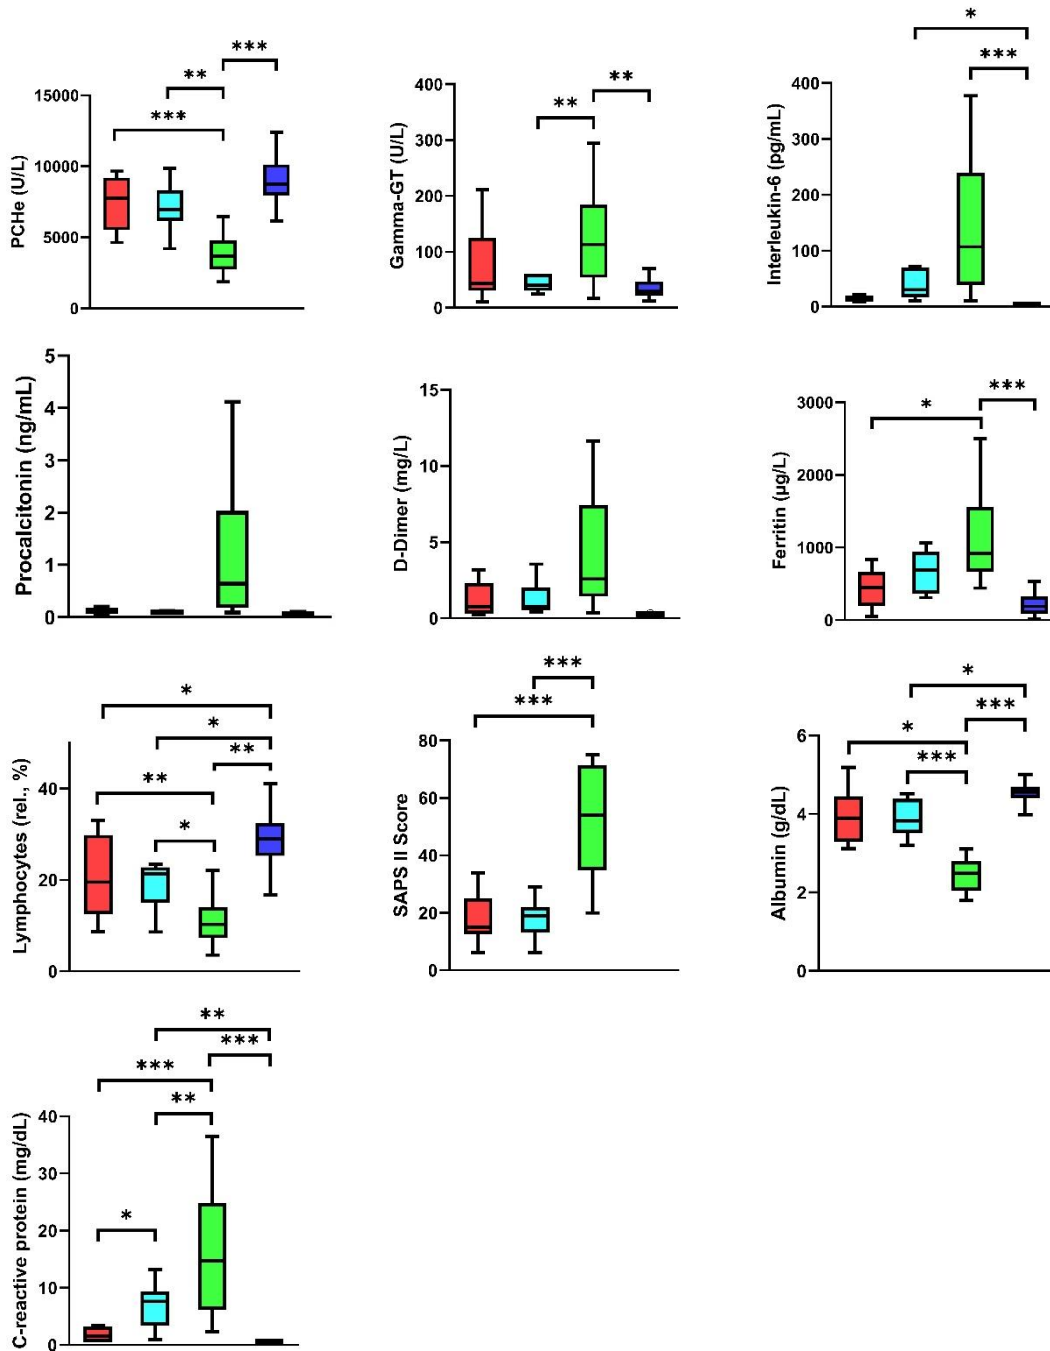

**Supplementary Figure S3.** Presentation of important laboratory parameters. Classification into moderate, severe and critical disease and convalescent patients (\* $p < 0.05$ , \*\* $p < 0.01$ , \*\*\* $p < 0.001$ ).
